# Supplementary material
Source: PubMed Central journal article supplement (PMC17606)

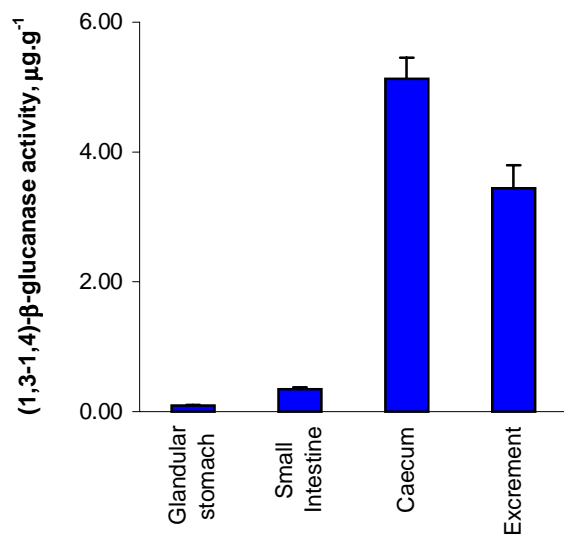

Supplement: pnas_97_25_13512__10.pdf [file pnas_97_25_13512__10.pdf]

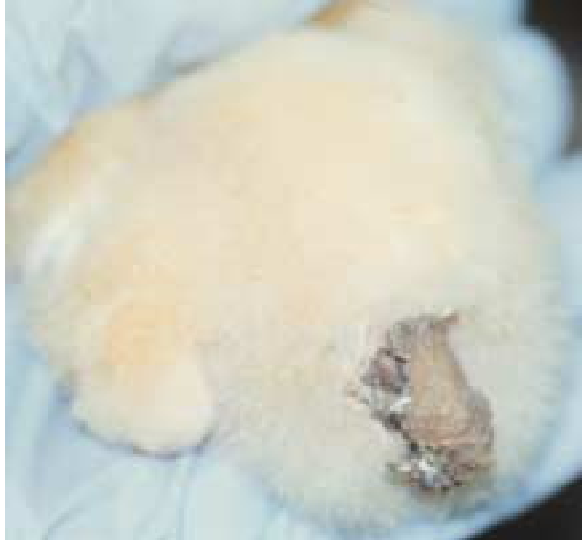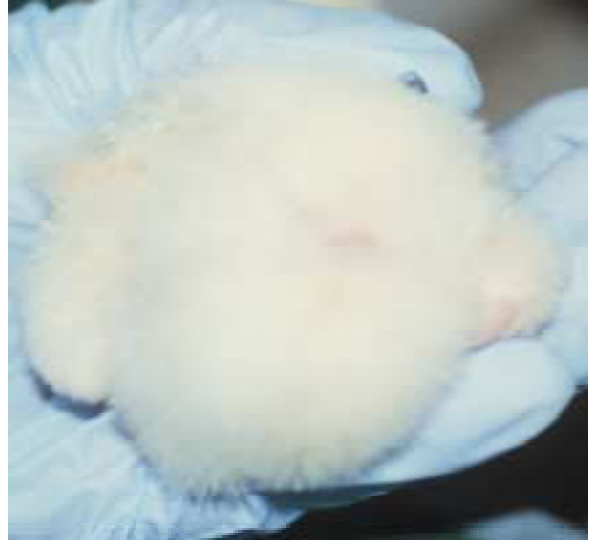

Supplement: pnas_97_25_13512__5.pdf [file pnas_97_25_13512__5.pdf]

Digestive tract  
of a fowl

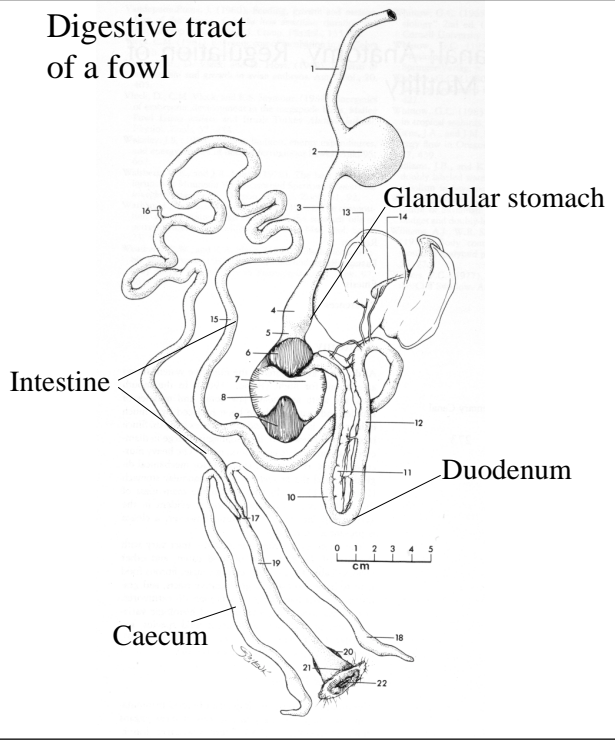

Supplement: pnas_97_25_13512__8.pdf [file pnas_97_25_13512__8.pdf]
